# Supplementary material for: Association Between Spine Surgery and Availability of Opioid Medication
Source: PubMed Central journal article supplement (PMC7317600; doi:10.1001/jamanetworkopen.2020.8974), 2020-06-25

## Supplementary Online Content

Warner NS, Habermann EB, Hooten WM et al. Association between spine surgery and availability of opioid medication. *JAMA Netw Open*. 2020;3(6):e208974. doi:10.1001/jamanetworkopen.2020.8974

**eTable 1.** Included CPT Codes and Their Description

**eTable 2.** Consortium to Study Opioid Risks and Trends (CONSORT) Definitions for Opioid Availability

**eFigure.** Study Population Flow Diagram

This supplementary material has been provided by the authors to give readers additional information about their work.

**eTable 1.** Included CPT Codes and Their Description

| Code  | Description                                                                                                                                                                                                                                                  |
|-------|--------------------------------------------------------------------------------------------------------------------------------------------------------------------------------------------------------------------------------------------------------------|
| 22532 | Arthrodesis, lateral extracavitary technique, including minimal discectomy to prepare interspace (other than for decompression); thoracic                                                                                                                    |
| 22533 | Arthrodesis, lateral extracavitary technique, including minimal discectomy to prepare interspace (other than for decompression); lumbar                                                                                                                      |
| 22534 | Arthrodesis, lateral extracavitary technique, including minimal discectomy to prepare interspace (other than for decompression); thoracic or lumbar, each additional vertebral segment (List separately in addition to code for primary procedure)           |
| 22551 | Arthrodesis, anterior interbody, including disc space preparation, discectomy, osteophyctomy and decompression of spinal cord and/or nerve roots; cervical below C2                                                                                          |
| 22552 | Arthrodesis, anterior interbody, including disc space preparation, discectomy, osteophyctomy and decompression of spinal cord and/or nerve roots; cervical below C2, each additional interspace (List separately in addition to code for separate procedure) |
| 22554 | Arthrodesis, anterior interbody technique, including minimal discectomy to prepare interspace (other than for decompression); cervical below C2                                                                                                              |
| 22556 | Arthrodesis, anterior interbody technique, including minimal discectomy to prepare interspace (other than for decompression); thoracic                                                                                                                       |
| 22558 | Arthrodesis, anterior interbody technique, including minimal discectomy to prepare interspace (other than for decompression); lumbar                                                                                                                         |
| 22585 | Arthrodesis, anterior interbody technique, including minimal discectomy to prepare interspace (other than for decompression); each additional interspace (List separately in addition to code for primary procedure)                                         |
| 22600 | Arthrodesis, posterior or posterolateral technique, single level; cervical below C2 segment                                                                                                                                                                  |
| 22610 | Arthrodesis, posterior or posterolateral technique, single level; thoracic (with lateral transverse technique, when performed)                                                                                                                               |
| 22612 | Arthrodesis, posterior or posterolateral technique, single level; lumbar (with lateral transverse technique, when performed)                                                                                                                                 |
| 22614 | Arthrodesis, posterior or posterolateral technique, single level; each additional vertebral segment (List separately in addition to code for primary procedure)                                                                                              |
| 22630 | Arthrodesis, posterior interbody technique, including laminectomy and/or discectomy to prepare interspace (other than for decompression), single interspace; lumbar                                                                                          |
| 22632 | Arthrodesis, posterior interbody technique, including laminectomy and/or discectomy to prepare interspace (other than for decompression), single interspace; each additional interspace (List separately in addition to code for primary procedure)          |

|       |                                                                                                                                                                                                                                                                                                                                           |
|-------|-------------------------------------------------------------------------------------------------------------------------------------------------------------------------------------------------------------------------------------------------------------------------------------------------------------------------------------------|
| 22633 | Arthrodesis, combined posterior or posterolateral technique with posterior interbody technique including laminectomy and/or discectomy sufficient to prepare interspace (other than for decompression), single interspace and segment; lumbar                                                                                             |
| 22634 | Arthrodesis, combined posterior or posterolateral technique with posterior interbody technique including laminectomy and/or discectomy sufficient to prepare interspace (other than for decompression), single interspace and segment; each additional interspace and segment (List separately in addition to code for primary procedure) |
| 22840 | Posterior non-segmental instrumentation (e.g., Harrington rod technique, pedicle fixation across 1 interspace, atlantoaxial transarticular screw fixation, sublaminar wiring at C1, facet screw fixation) (List separately in addition to code for primary procedure)                                                                     |
| 22841 | Internal spinal fixation by wiring of spinous processes (List separately in addition to code for primary procedure)                                                                                                                                                                                                                       |
| 22842 | Posterior segmental instrumentation (e.g., pedicle fixation, dual rods with multiple hooks and sublaminar wires); 3 to 6 vertebral segments (List separately in addition to code for primary procedure)                                                                                                                                   |
| 22843 | Posterior segmental instrumentation (e.g., pedicle fixation, dual rods with multiple hooks and sublaminar wires); 7 to 12 vertebral segments (List separately in addition to code for primary procedure)                                                                                                                                  |
| 22844 | Posterior segmental instrumentation (e.g., pedicle fixation, dual rods with multiple hooks and sublaminar wires); 13 or more vertebral segments (List separately in addition to code for primary procedure)                                                                                                                               |
| 22845 | Anterior instrumentation; 2 to 3 vertebral segments (List separately in addition to code for primary procedure)                                                                                                                                                                                                                           |
| 22846 | Anterior instrumentation; 4 to 7 vertebral segments (List separately in addition to code for primary procedure)                                                                                                                                                                                                                           |
| 22847 | Anterior instrumentation; 8 or more vertebral segments (List separately in addition to code for primary procedure)                                                                                                                                                                                                                        |
| 22848 | Pelvic fixation (attachment of caudal end of instrumentation to pelvic bony structures) other than sacrum (List separately in addition to code for primary procedure)                                                                                                                                                                     |
| 22856 | Total disc arthroplasty (artificial disc), anterior approach, including discectomy with end plate preparation (includes osteophyctomy for nerve root or spinal cord decompression and microdissection); single interspace, cervical                                                                                                       |
| 22861 | Revision including replacement of total disc arthroplasty (artificial disc), anterior approach, single interspace; cervical                                                                                                                                                                                                               |
| 63001 | Laminectomy with exploration and/or decompression of spinal cord and/or cauda equina, without facetectomy, foraminotomy or discectomy (e.g., spinal stenosis), 1 or 2 vertebral segments; cervical                                                                                                                                        |
| 63003 | Laminectomy with exploration and/or decompression of spinal cord and/or cauda equina, without facetectomy, foraminotomy or discectomy (e.g., spinal stenosis), 1 or 2 vertebral segments; thoracic                                                                                                                                        |
| 63005 | Laminectomy with exploration and/or decompression of spinal cord and/or cauda equina, without facetectomy, foraminotomy or discectomy (e.g., spinal stenosis), 1 or 2 vertebral segments; lumbar, except for spondylolisthesis                                                                                                            |
| 63011 | Laminectomy with exploration and/or decompression of spinal cord and/or cauda equina, without facetectomy, foraminotomy or discectomy (e.g., spinal stenosis), 1 or 2 vertebral segments; sacral                                                                                                                                          |
| 63012 | Laminectomy with removal of abnormal facets and/or pars inter-articularis with decompression of cauda equina and nerve roots for spondylolisthesis, lumbar (Gill type procedure)                                                                                                                                                          |

|       |                                                                                                                                                                                                                                                                                                                                   |
|-------|-----------------------------------------------------------------------------------------------------------------------------------------------------------------------------------------------------------------------------------------------------------------------------------------------------------------------------------|
| 63015 | Laminectomy with exploration and/or decompression of spinal cord and/or cauda equina, without facetectomy, foraminotomy or discectomy (e.g., spinal stenosis), more than 2 vertebral segments; cervical                                                                                                                           |
| 63016 | Laminectomy with exploration and/or decompression of spinal cord and/or cauda equina, without facetectomy, foraminotomy or discectomy (e.g., spinal stenosis), more than 2 vertebral segments; thoracic                                                                                                                           |
| 63017 | Laminectomy with exploration and/or decompression of spinal cord and/or cauda equina, without facetectomy, foraminotomy or discectomy (e.g., spinal stenosis), more than 2 vertebral segments; lumbar                                                                                                                             |
| 63020 | Laminotomy (hemilaminectomy), with decompression of nerve root(s), including partial facetectomy, foraminotomy and/or excision of herniated intervertebral disc; 1 interspace, cervical                                                                                                                                           |
| 63030 | Laminotomy (hemilaminectomy), with decompression of nerve root(s), including partial facetectomy, foraminotomy and/or excision of herniated intervertebral disc; 1 interspace, lumbar                                                                                                                                             |
| 63035 | Laminotomy (hemilaminectomy), with decompression of nerve root(s), including partial facetectomy, foraminotomy and/or excision of herniated intervertebral disc; each additional interspace, cervical or lumbar (List separately in addition to code for primary procedure)                                                       |
| 63040 | Laminotomy (hemilaminectomy), with decompression of nerve root(s), including partial facetectomy, foraminotomy and/or excision of herniated intervertebral disc, reexploration, single interspace; cervical                                                                                                                       |
| 63042 | Laminotomy (hemilaminectomy), with decompression of nerve root(s), including partial facetectomy, foraminotomy and/or excision of herniated intervertebral disc, reexploration, single interspace; lumbar                                                                                                                         |
| 63043 | Laminotomy (hemilaminectomy), with decompression of nerve root(s), including partial facetectomy, foraminotomy and/or excision of herniated intervertebral disc, reexploration, single interspace; each additional cervical interspace (List separately in addition to code for primary procedure)                                |
| 63044 | Laminotomy (hemilaminectomy), with decompression of nerve root(s), including partial facetectomy, foraminotomy and/or excision of herniated intervertebral disc, reexploration, single interspace; each additional lumbar interspace (List separately in addition to code for primary procedure)                                  |
| 63045 | Laminectomy, facetectomy and foraminotomy (unilateral or bilateral with decompression of spinal cord, cauda equina and/or nerve root[s], [e.g., spinal or lateral recess stenosis]), single vertebral segment; cervical                                                                                                           |
| 63046 | Laminectomy, facetectomy and foraminotomy (unilateral or bilateral with decompression of spinal cord, cauda equina and/or nerve root[s], [e.g., spinal or lateral recess stenosis]), single vertebral segment; thoracic                                                                                                           |
| 63047 | Laminectomy, facetectomy and foraminotomy (unilateral or bilateral with decompression of spinal cord, cauda equina and/or nerve root[s], [e.g., spinal or lateral recess stenosis]), single vertebral segment; lumbar                                                                                                             |
| 63048 | Laminectomy, facetectomy and foraminotomy (unilateral or bilateral with decompression of spinal cord, cauda equina and/or nerve root[s], [e.g., spinal or lateral recess stenosis]), single vertebral segment; each additional segment, cervical, thoracic, or lumbar (List separately in addition to code for primary procedure) |
| 63050 | Laminoplasty, cervical, with decompression of the spinal cord, 2 or more vertebral segments;                                                                                                                                                                                                                                      |

|       |                                                                                                                                                                                                                                                                                         |
|-------|-----------------------------------------------------------------------------------------------------------------------------------------------------------------------------------------------------------------------------------------------------------------------------------------|
| 63051 | Laminoplasty, cervical, with decompression of the spinal cord, 2 or more vertebral segments; with reconstruction of the posterior bony elements (including the application of bridging bone graft and non-segmental fixation devices [e.g., wire, suture, mini-plates], when performed) |
| 63055 | Transpedicular approach with decompression of spinal cord, equina and/or nerve root(s) (e.g., herniated intervertebral disc), single segment; thoracic                                                                                                                                  |
| 63056 | Transpedicular approach with decompression of spinal cord, equina and/or nerve root(s) (e.g., herniated intervertebral disc), single segment; lumbar (including transfacet, or lateral extraforaminal approach) (e.g., far lateral herniated intervertebral disc)                       |
| 63057 | Transpedicular approach with decompression of spinal cord, equina and/or nerve root(s) (e.g., herniated intervertebral disc), single segment; each additional segment, thoracic or lumbar (List separately in addition to code for primary procedure)                                   |
| 63064 | Costovertebral approach with decompression of spinal cord or nerve root(s) (e.g., herniated intervertebral disc), thoracic; single segment                                                                                                                                              |
| 63066 | Costovertebral approach with decompression of spinal cord or nerve root(s) (e.g., herniated intervertebral disc), thoracic; each additional segment (List separately in addition to code for primary procedure)                                                                         |
| 63075 | Discectomy, anterior, with decompression of spinal cord and/or nerve root(s), including osteophytectomy; cervical, single interspace                                                                                                                                                    |
| 63076 | Discectomy, anterior, with decompression of spinal cord and/or nerve root(s), including osteophytectomy; cervical, each additional interspace (List separately in addition to code for primary procedure)                                                                               |
| 63077 | Discectomy, anterior, with decompression of spinal cord and/or nerve root(s), including osteophytectomy; thoracic, single interspace                                                                                                                                                    |
| 63078 | Discectomy, anterior, with decompression of spinal cord and/or nerve root(s), including osteophytectomy; thoracic, each additional interspace (List separately in addition to code for primary procedure)                                                                               |
| 63081 | Vertebral corpectomy (vertebral body resection), partial or complete, anterior approach with decompression of spinal cord and/or nerve root(s); cervical, single segment                                                                                                                |
| 63082 | Vertebral corpectomy (vertebral body resection), partial or complete, anterior approach with decompression of spinal cord and/or nerve root(s); cervical, each additional segment (List separately in addition to code for primary procedure)                                           |
| 63085 | Vertebral corpectomy (vertebral body resection), partial or complete, transthoracic approach with decompression of spinal cord and/or nerve root(s); thoracic, single segment                                                                                                           |
| 63086 | Vertebral corpectomy (vertebral body resection), partial or complete, transthoracic approach with decompression of spinal cord and/or nerve root(s); thoracic, each additional segment (List separately in addition to code for primary procedure)                                      |
| 63087 | Vertebral corpectomy (vertebral body resection), partial or complete, combined thoracolumbar approach with decompression of spinal cord, cauda equina or nerve root(s), lower thoracic or lumbar; single segment                                                                        |

|       |                                                                                                                                                                                                                                                                                                                      |
|-------|----------------------------------------------------------------------------------------------------------------------------------------------------------------------------------------------------------------------------------------------------------------------------------------------------------------------|
| 63088 | Vertebral corpectomy (vertebral body resection), partial or complete, combined thoracolumbar approach with decompression of spinal cord, cauda equina or nerve root(s), lower thoracic or lumbar; each additional segment (List separately in addition to code for primary procedure)                                |
| 63090 | Vertebral corpectomy (vertebral body resection), partial or complete, transperitoneal or retroperitoneal approach with decompression of spinal cord, cauda equina or nerve root(s), lower thoracic, lumbar, or sacral; single segment                                                                                |
| 63091 | Vertebral corpectomy (vertebral body resection), partial or complete, transperitoneal or retroperitoneal approach with decompression of spinal cord, cauda equina or nerve root(s), lower thoracic, lumbar, or sacral; each additional segment (List separately in addition to code for primary procedure)           |
| 63101 | Vertebral corpectomy (vertebral body resection), partial or complete, lateral extracavitary approach with decompression of spinal cord and/or nerve root(s) (e.g., for tumor or retropulsed bone fragments); thoracic, single segment                                                                                |
| 63102 | Vertebral corpectomy (vertebral body resection), partial or complete, lateral extracavitary approach with decompression of spinal cord and/or nerve root(s) (e.g., for tumor or retropulsed bone fragments); lumbar, single segment                                                                                  |
| 63103 | Vertebral corpectomy (vertebral body resection), partial or complete, lateral extracavitary approach with decompression of spinal cord and/or nerve root(s) (e.g., for tumor or retropulsed bone fragments); thoracic or lumbar, each additional segment (List separately in addition to code for primary procedure) |
| 63265 | Laminectomy for excision or evacuation of intraspinal lesion other than neoplasm, extradural; cervical                                                                                                                                                                                                               |
| 63266 | Laminectomy for excision or evacuation of intraspinal lesion other than neoplasm, extradural; thoracic                                                                                                                                                                                                               |
| 63267 | Laminectomy for excision or evacuation of intraspinal lesion other than neoplasm, extradural; lumbar                                                                                                                                                                                                                 |
| 63268 | Laminectomy for excision or evacuation of intraspinal lesion other than neoplasm, extradural; sacral                                                                                                                                                                                                                 |
| 63270 | Laminectomy for excision of intraspinal lesion other than neoplasm, intradural; cervical                                                                                                                                                                                                                             |
| 63271 | Laminectomy for excision of intraspinal lesion other than neoplasm, intradural; thoracic                                                                                                                                                                                                                             |
| 63272 | Laminectomy for excision of intraspinal lesion other than neoplasm, intradural; lumbar                                                                                                                                                                                                                               |
| 63273 | Laminectomy for excision of intraspinal lesion other than neoplasm, intradural; sacral                                                                                                                                                                                                                               |
| 63275 | Laminectomy for biopsy/excision of intraspinal neoplasm; extradural, cervical                                                                                                                                                                                                                                        |
| 63276 | Laminectomy for biopsy/excision of intraspinal neoplasm; extradural, thoracic                                                                                                                                                                                                                                        |
| 63277 | Laminectomy for biopsy/excision of intraspinal neoplasm; extradural, lumbar                                                                                                                                                                                                                                          |
| 63278 | Laminectomy for biopsy/excision of intraspinal neoplasm; extradural, sacral                                                                                                                                                                                                                                          |
| 63280 | Laminectomy for biopsy/excision of intraspinal neoplasm; intradural, extramedullary, cervical                                                                                                                                                                                                                        |
| 63281 | Laminectomy for biopsy/excision of intraspinal neoplasm; intradural, extramedullary, thoracic                                                                                                                                                                                                                        |
| 63282 | Laminectomy for biopsy/excision of intraspinal neoplasm; intradural, extramedullary, lumbar                                                                                                                                                                                                                          |
| 63283 | Laminectomy for biopsy/excision of intraspinal neoplasm; intradural, sacral                                                                                                                                                                                                                                          |
| 63285 | Laminectomy for biopsy/excision of intraspinal neoplasm; intradural, intramedullary, cervical                                                                                                                                                                                                                        |
| 63286 | Laminectomy for biopsy/excision of intraspinal neoplasm; intradural, intramedullary, thoracic                                                                                                                                                                                                                        |

|       |                                                                                                                                                                                                                                     |
|-------|-------------------------------------------------------------------------------------------------------------------------------------------------------------------------------------------------------------------------------------|
| 63287 | Laminectomy for biopsy/excision of intraspinal neoplasm; intradural, intramedullary, thoracolumbar                                                                                                                                  |
| 63290 | Laminectomy for biopsy/excision of intraspinal neoplasm; combined extradural-intradural lesion, any level                                                                                                                           |
| 63295 | Osteoplastic reconstruction of dorsal spinal elements, following primary intraspinal procedure (List separately in addition to code for primary procedure)                                                                          |
| 63300 | Vertebral corpectomy (vertebral body resection), partial or complete, for excision of intraspinal lesion, single segment; extradural, cervical                                                                                      |
| 63301 | Vertebral corpectomy (vertebral body resection), partial or complete, for excision of intraspinal lesion, single segment; extradural, thoracic by transthoracic approach                                                            |
| 63302 | Vertebral corpectomy (vertebral body resection), partial or complete, for excision of intraspinal lesion, single segment; extradural, thoracic by thoracolumbar approach                                                            |
| 63303 | Vertebral corpectomy (vertebral body resection), partial or complete, for excision of intraspinal lesion, single segment; extradural, lumbar or sacral by transperitoneal or retroperitoneal approach                               |
| 63304 | Vertebral corpectomy (vertebral body resection), partial or complete, for excision of intraspinal lesion, single segment; intradural, cervical                                                                                      |
| 63305 | Vertebral corpectomy (vertebral body resection), partial or complete, for excision of intraspinal lesion, single segment; intradural, thoracic by transthoracic approach                                                            |
| 63306 | Vertebral corpectomy (vertebral body resection), partial or complete, for excision of intraspinal lesion, single segment; intradural, thoracic by thoracolumbar approach                                                            |
| 63307 | Vertebral corpectomy (vertebral body resection), partial or complete, for excision of intraspinal lesion, single segment; intradural, lumbar or sacral by transperitoneal or retroperitoneal approach                               |
| 63308 | Vertebral corpectomy (vertebral body resection), partial or complete, for excision of intraspinal lesion, single segment; each additional segment (List separately in addition to codes for single segment)                         |
| 22100 | Partial excision of posterior vertebral component (e.g., spinous process, lamina or facet) for intrinsic bony lesion, single vertebral segment; cervical                                                                            |
| 22101 | Partial excision of posterior vertebral component (e.g., spinous process, lamina or facet) for intrinsic bony lesion, single vertebral segment; thoracic                                                                            |
| 22102 | Partial excision of posterior vertebral component (e.g., spinous process, lamina or facet) for intrinsic bony lesion, single vertebral segment; lumbar                                                                              |
| 22103 | Partial excision of posterior vertebral component (e.g., spinous process, lamina or facet) for intrinsic bony lesion, single vertebral segment; each additional segment (List separately in addition to code for primary procedure) |
| 22105 | Partial resection of vertebral component for tumor (e.g., partial facetectomy, without primary grafting); cervical                                                                                                                  |
| 22106 | Partial resection of vertebral component for tumor (e.g., partial facetectomy, without primary grafting); thoracic                                                                                                                  |
| 22107 | Partial resection of vertebral component for tumor (e.g., partial facetectomy, without primary grafting); lumbar                                                                                                                    |

|       |                                                                                                                                                                                                                                               |
|-------|-----------------------------------------------------------------------------------------------------------------------------------------------------------------------------------------------------------------------------------------------|
| 22110 | Partial excision of vertebral body, for intrinsic bony lesion, without decompression of spinal cord or nerve root(s), single vertebral segment; cervical                                                                                      |
| 22112 | Partial excision of vertebral body, for intrinsic bony lesion, without decompression of spinal cord or nerve root(s), single vertebral segment; thoracic                                                                                      |
| 22114 | Partial excision of vertebral body, for intrinsic bony lesion, without decompression of spinal cord or nerve root(s), single vertebral segment; lumbar                                                                                        |
| 22116 | Partial excision of vertebral body, for intrinsic bony lesion, without decompression of spinal cord or nerve root(s), single vertebral segment; each additional vertebral segment (List separately in addition to code for primary procedure) |
| 22140 | Reconstruction of spine with bone graft (autograft, allograft) and/or methylmethacrylate following resection of single vertebral body; cervical                                                                                               |
| 22141 | Reconstruction of spine with bone graft (autograft, allograft) and/or methylmethacrylate following resection of single vertebral body; thoracic                                                                                               |
| 22142 | Reconstruction of spine with bone graft (autograft, allograft) and/or methylmethacrylate following resection of single vertebral body; lumbar                                                                                                 |
| 22145 | Reconstruction of spine following vertebral body resection, each additional vertebral body                                                                                                                                                    |
| 22206 | Osteotomy of spine, posterior or posterolateral approach, 3 columns, 1 vertebral segment (e.g., pedicle/vertebral body subtraction); thoracic                                                                                                 |
| 22207 | Osteotomy of spine, posterior or posterolateral approach, 3 columns, 1 vertebral segment (e.g., pedicle/vertebral body subtraction); lumbar                                                                                                   |
| 22208 | Osteotomy of spine, posterior or posterolateral approach, 3 columns, 1 vertebral segment (e.g., pedicle/vertebral body subtraction); each additional vertebral segment (List separately in addition to code for primary procedure)            |
| 22210 | Osteotomy of spine, posterior or posterolateral approach, 1 vertebral segment; cervical                                                                                                                                                       |
| 22212 | Osteotomy of spine, posterior or posterolateral approach, 1 vertebral segment; thoracic                                                                                                                                                       |
| 22214 | Osteotomy of spine, posterior or posterolateral approach, 1 vertebral segment; lumbar                                                                                                                                                         |
| 22216 | Osteotomy of spine, posterior or posterolateral approach, 1 vertebral segment; each additional vertebral segment (List separately in addition to primary procedure)                                                                           |
| 22220 | Osteotomy of spine, including discectomy, anterior approach, single vertebral segment; cervical                                                                                                                                               |
| 22222 | Osteotomy of spine, including discectomy, anterior approach, single vertebral segment; thoracic                                                                                                                                               |
| 22224 | Osteotomy of spine, including discectomy, anterior approach, single vertebral segment; lumbar                                                                                                                                                 |
| 22226 | Osteotomy of spine, including discectomy, anterior approach, single vertebral segment; each additional vertebral segment (List separately in addition to code for primary procedure)                                                          |
| 22318 | Open treatment and/or reduction of odontoid fracture(s) and or dislocation(s) (including os odontoideum), anterior approach, including placement of internal fixation; without grafting                                                       |



|       |                                                                                                                                                                                                                                                                      |
|-------|----------------------------------------------------------------------------------------------------------------------------------------------------------------------------------------------------------------------------------------------------------------------|
| 22319 | Open treatment and/or reduction of odontoid fracture(s) and or dislocation(s) (including os odontoideum), anterior approach, including placement of internal fixation; with grafting                                                                                 |
| 22325 | Open treatment and/or reduction of vertebral fracture(s) and/or dislocation(s), posterior approach, 1 fractured vertebra or dislocated segment; lumbar                                                                                                               |
| 22326 | Open treatment and/or reduction of vertebral fracture(s) and/or dislocation(s), posterior approach, 1 fractured vertebra or dislocated segment; cervical                                                                                                             |
| 22327 | Open treatment and/or reduction of vertebral fracture(s) and/or dislocation(s), posterior approach, 1 fractured vertebra or dislocated segment; thoracic                                                                                                             |
| 22328 | Open treatment and/or reduction of vertebral fracture(s) and/or dislocation(s), posterior approach, 1 fractured vertebra or dislocated segment; each additional fractured vertebra or dislocated segment (List separately in addition to code for primary procedure) |
| 22548 | Arthrodesis, anterior transoral or extraoral technique, clivus-C1-C2 (atlas-axis), with or without excision of odontoid process                                                                                                                                      |
| 22586 | Arthrodesis, pre-sacral interbody technique, including disc space preparation, discectomy, with posterior instrumentation, with image guidance, includes bone graft when performed, L5-S1 interspace                                                                 |
| 22590 | Arthrodesis, posterior technique, craniocervical (occiput-C2)                                                                                                                                                                                                        |
| 22595 | Arthrodesis, posterior technique, atlas-axis (C1-C2)                                                                                                                                                                                                                 |
| 22625 | Arthrodesis, lateral transverse process technique, with local bone or bone allograft and/or internal wire fixation, lumbar                                                                                                                                           |
| 22800 | Arthrodesis, posterior, for spinal deformity, with or without cast; up to 6 vertebral segments                                                                                                                                                                       |
| 22802 | Arthrodesis, posterior, for spinal deformity, with or without cast; 7 to 12 vertebral segments                                                                                                                                                                       |
| 22804 | Arthrodesis, posterior, for spinal deformity, with or without cast; 13 or more vertebral segments                                                                                                                                                                    |
| 22808 | Arthrodesis, anterior, for spinal deformity, with or without cast; 2 to 3 vertebral segments                                                                                                                                                                         |
| 22810 | Arthrodesis, anterior, for spinal deformity, with or without cast; 4 to 7 vertebral segments                                                                                                                                                                         |
| 22812 | Arthrodesis, anterior, for spinal deformity, with or without cast; 8 or more vertebral segments                                                                                                                                                                      |
| 22818 | Kyphectomy, circumferential exposure of spine and resection of vertebral segment(s) (including body and posterior elements); single or 2 segments                                                                                                                    |
| 22819 | Kyphectomy, circumferential exposure of spine and resection of vertebral segment(s) (including body and posterior elements); 3 or more segments                                                                                                                      |
| 22849 | Reinsertion of spinal fixation device                                                                                                                                                                                                                                |
| 22850 | Removal of posterior nonsegmental instrumentation (e.g., Harrington rod)                                                                                                                                                                                             |
| 22851 | Application of intervertebral biomechanical device(s) (e.g., synthetic cage(s), methylmethacrylate) to vertebral defect or interspace (List separately in addition to code for primary procedure)                                                                    |
| 22852 | Removal of posterior segmental instrumentation                                                                                                                                                                                                                       |

|       |                                                                                                                                                                                                                                                                                                                                                                                                          |
|-------|----------------------------------------------------------------------------------------------------------------------------------------------------------------------------------------------------------------------------------------------------------------------------------------------------------------------------------------------------------------------------------------------------------|
| 22853 | Insertion of interbody biomechanical device(s) (e.g., synthetic cage, mesh) with integral anterior instrumentation for device anchoring (e.g., screws, flanges), when performed, to intervertebral disc space in conjunction with interbody arthrodesis, each interspace (List separately in addition to code for primary procedure)                                                                     |
| 22854 | Insertion of intervertebral biomechanical device(s) (e.g., synthetic cage, mesh) with integral anterior instrumentation for device anchoring (e.g., screws, flanges), when performed, to vertebral corpectomy(ies) (vertebral body resection, partial or complete) defect, in conjunction with interbody arthrodesis, each contiguous defect (List separately in addition to code for primary procedure) |
| 22855 | Removal of anterior instrumentation                                                                                                                                                                                                                                                                                                                                                                      |
| 22857 | Total disc arthroplasty (artificial disc), anterior approach, including discectomy to prepare interspace (other than for decompression), single interspace, lumbar                                                                                                                                                                                                                                       |
| 22858 | Total disc arthroplasty (artificial disc), anterior approach, including discectomy with end plate preparation (includes osteophyctomy for nerve root or spinal cord decompression and microdissection); second level, cervical (List separately in addition to code for primary procedure)                                                                                                               |
| 22859 | Insertion of intervertebral biomechanical device(s) (e.g., synthetic cage, mesh, methylmethacrylate) to intervertebral disc space or vertebral body defect without interbody arthrodesis, each contiguous defect (List separately in addition to code for primary procedure)                                                                                                                             |
| 22862 | Revision including replacement of total disc arthroplasty (artificial disc), anterior approach, single interspace; lumbar                                                                                                                                                                                                                                                                                |
| 22864 | Removal of total disc arthroplasty (artificial disc), anterior approach, single interspace; cervical                                                                                                                                                                                                                                                                                                     |
| 22865 | Removal of total disc arthroplasty (artificial disc), anterior approach, single interspace; lumbar                                                                                                                                                                                                                                                                                                       |
| 22867 | Insertion of interlaminar/interspinous process stabilization/distraction device, without fusion, including image guidance when performed, with open decompression, lumbar; single level                                                                                                                                                                                                                  |
| 22868 | Insertion of interlaminar/interspinous process stabilization/distraction device, without fusion, including image guidance when performed, with open decompression, lumbar; second level (List separately in addition to code for primary procedure)                                                                                                                                                      |
| 22869 | Insertion of interlaminar/interspinous process stabilization/distraction device, without open decompression or fusion, including image guidance when performed, lumbar; single level                                                                                                                                                                                                                     |
| 22870 | Insertion of interlaminar/interspinous process stabilization/distraction device, without open decompression or fusion, including image guidance when performed, lumbar; second level (List separately in addition to code for primary procedure)                                                                                                                                                         |
| 63170 | Laminectomy with myelotomy (e.g., Bischof or DREZ type), cervical, thoracic, or thoracolumbar                                                                                                                                                                                                                                                                                                            |
| 63172 | Laminectomy with drainage of intramedullary cyst/syrinx; to subarachnoid space                                                                                                                                                                                                                                                                                                                           |
| 63173 | Laminectomy with drainage of intramedullary cyst/syrinx; to peritoneal or pleural space                                                                                                                                                                                                                                                                                                                  |
| 63180 | Laminectomy and section of dentate ligaments, with or without dural graft, cervical; 1 or 2 segments                                                                                                                                                                                                                                                                                                     |

|       |                                                                                                           |
|-------|-----------------------------------------------------------------------------------------------------------|
| 63182 | Laminectomy and section of dentate ligaments, with or without dural graft, cervical; more than 2 segments |
| 63185 | Laminectomy with rhizotomy; 1 or 2 segments                                                               |
| 63190 | Laminectomy with rhizotomy; more than 2 segments                                                          |
| 63191 | Laminectomy with section of spinal accessory nerve                                                        |
| 63194 | Laminectomy with cordotomy, with section of 1 spinothalamic tract, 1 stage; cervical                      |
| 63195 | Laminectomy with cordotomy, with section of 1 spinothalamic tract, 1 stage; thoracic                      |
| 63196 | Laminectomy with cordotomy, with section of both spinothalamic tracts, 1 stage; cervical                  |
| 63197 | Laminectomy with cordotomy, with section of both spinothalamic tracts, 1 stage; thoracic                  |
| 63198 | Laminectomy with cordotomy with section of both spinothalamic tracts, 2 stages within 14 days; cervical   |
| 63199 | Laminectomy with cordotomy with section of both spinothalamic tracts, 2 stages within 14 days; thoracic   |
| 63200 | Laminectomy, with release of tethered spinal cord, lumbar                                                 |
| 63250 | Laminectomy for excision or occlusion of arteriovenous malformation of spinal cord; cervical              |
| 63251 | Laminectomy for excision or occlusion of arteriovenous malformation of spinal cord; thoracic              |
| 63252 | Laminectomy for excision or occlusion of arteriovenous malformation of spinal cord; thoracolumbar         |

**eTable 2.** Consortium to Study Opioid Risks and Trends (CONSORT) Definitions for Opioid Availability

| <b>CONSORT Classification</b> | <b>Definition</b>                                                                                                                                |
|-------------------------------|--------------------------------------------------------------------------------------------------------------------------------------------------|
| None                          | No opioid prescription availability in the 180-day period of interest (i.e. 180 days prior to surgery)                                           |
| Short-Term                    | Opioid prescription availability for less than 90 days during the 180-day period of interest                                                     |
| Episodic                      | Opioid prescription availability for $\geq 90$ but $< 120$ days with $< 10$ opioid prescriptions during the 180-day period of interest           |
| Chronic                       | Opioid prescription availability $> 90$ days with $> 10$ prescriptions or opioid availability $> 120$ days during the 180-day period of interest |

**eFigure.** Study Population Flow Diagram

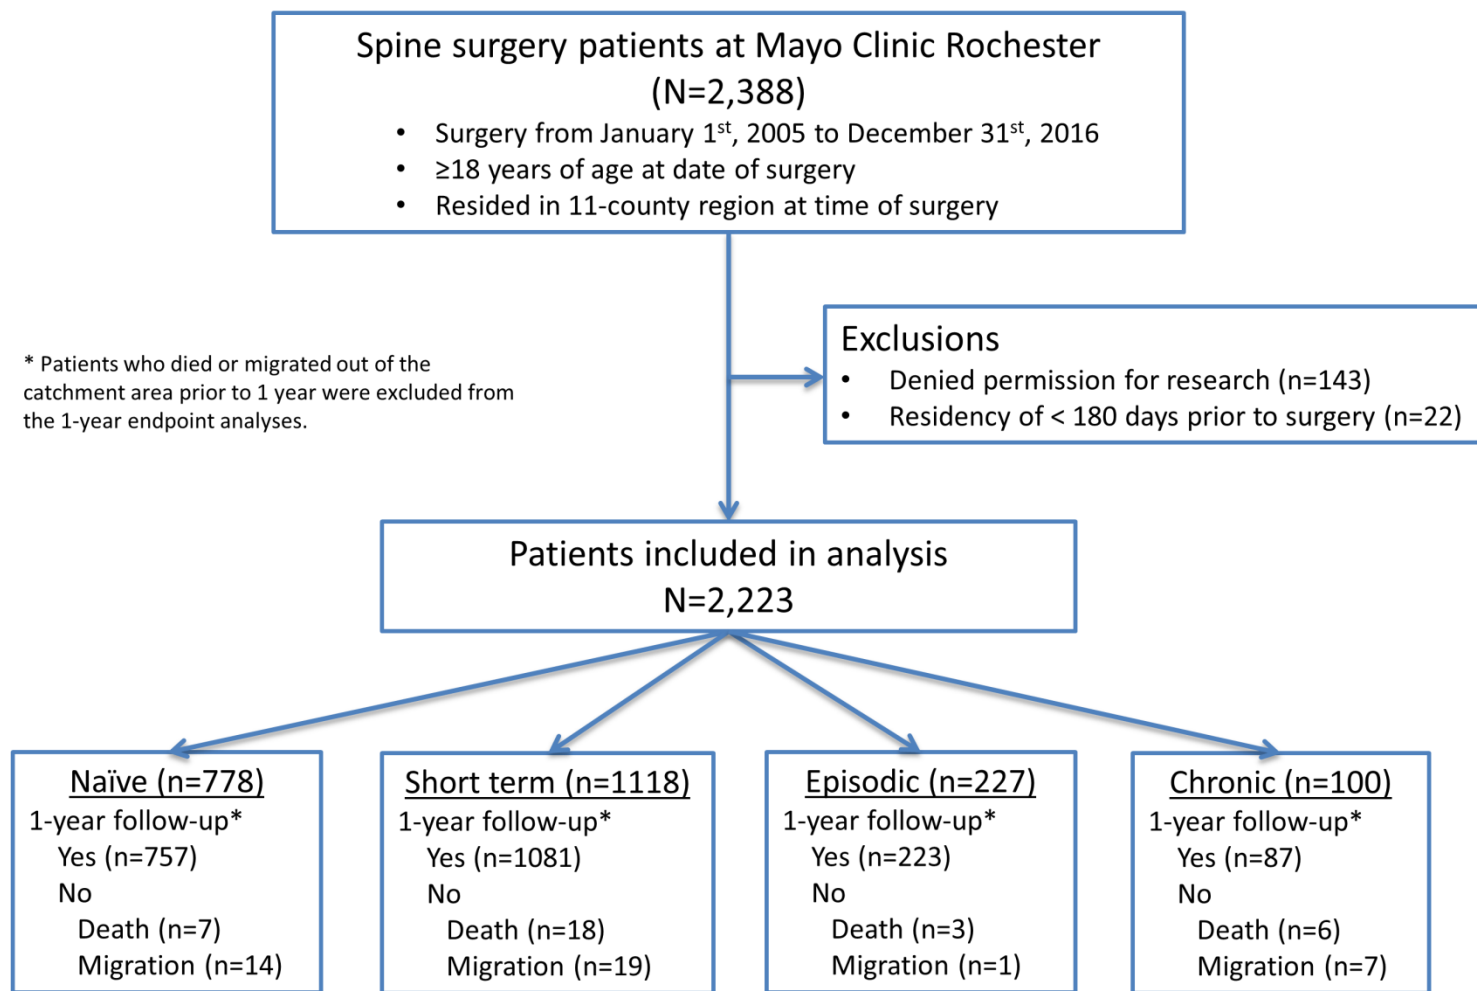

Supplement: jamanetwopen-3-e208974-s001.pdf [file jamanetwopen-3-e208974-s001.pdf]
